# Supplementary material for: Fine-tuning carbapenem resistance by reducing porin permeability of bacteria activated in the selection process of conjugation
Source: PubMed Central journal article supplement (PMC6189183; doi:10.1038/s41598-018-33568-8), 2018-10-15
Supplement: 41598_2018_33568_MOESM1_ESM.pdf [file 41598_2018_33568_MOESM1_ESM.pdf]

**Fine-tuning carbapenem resistance by reducing porin permeability of  
bacteria activated in the selection process of conjugation**

*Hoi-Kuan Kong<sup>1</sup>, Qing Pan<sup>1</sup>, Wai-U Lo<sup>2</sup>, Xuan Liu<sup>1</sup>, Carmen OK Law<sup>1</sup>,*

*Ting-fung Chan<sup>3</sup>, Pak-Leung Ho<sup>2</sup>, Terrence Chi-Kong Lau<sup>1,#</sup>*

<sup>1</sup> Department of Biomedical Sciences, City University of Hong Kong, Hong Kong Special Administrative Region, People's Republic of China.

<sup>2</sup> Department of Microbiology and Carol Yu Centre for Infection, The University of Hong Kong, Hong Kong Special Administrative Region, People's Republic of China.

<sup>3</sup> School of Life Sciences, The Chinese University of Hong Kong, Hong Kong Special Administrative Region, People's Republic of China.

# Address correspondence to Terrence Chi-Kong Lau, [chiklau@cityu.edu.hk](mailto:chiklau@cityu.edu.hk).

Supplementary information

**TABLE S1.** *E. coli* strains and plasmids used in this study.

| Strain         | Genotype                                                                                                                                                                             | Ref or source              |
|----------------|--------------------------------------------------------------------------------------------------------------------------------------------------------------------------------------|----------------------------|
| BW25113        | <i>lacI<sup>r</sup>rmB<sub>T14</sub> ΔlacZ<sub>WJ16</sub> hsdR514 ΔaraBAD<sub>AH33</sub> ΔrhaBAD<sub>LD78</sub> rph-1 Δ(araB-D)567 Δ(rhaD-B)568 ΔlacZ4787(::rmB-3) hsdR514 rph-1</i> | (1)                        |
| DH5α           | <i>F<sup>-</sup> φ80dlacZΔM15 Δ(lacZYA-argF)U169 deoR recA1 endA1 hsdR17(rk<sup>-</sup> mk<sup>+</sup>) phoA supE44 λ-thi-1 gyrA96 relA1</i>                                         | Lab stock                  |
| BL21DE3        | <i>fhuA2 [lon] ompT gal (λ DE3) [dcm] ΔhsdS λ DE3 = λ sBamHlo ΔEcoRI-B int::(lacI::PlacUV5::T7 gene1) i21 Δnin5</i>                                                                  | Lab stock                  |
| MG1655         | <i>F<sup>-</sup>, λ<sup>-</sup>, rph-1</i>                                                                                                                                           | Lab stock                  |
| J53            | <i>F<sup>+</sup> met pro Azi<sup>r</sup></i>                                                                                                                                         | Lab stock                  |
| JW3368         | BW25113 <i>ompR::kan</i> , Kn <sup>r</sup>                                                                                                                                           | (1)                        |
| JW2203         | BW25113 <i>ompC::kan</i> , Kn <sup>r</sup>                                                                                                                                           | (1)                        |
| JW0912         | BW25113 <i>ompF::kan</i> , Kn <sup>r</sup>                                                                                                                                           | (1)                        |
| <b>Plasmid</b> |                                                                                                                                                                                      |                            |
| pET28a         | phage T7 promoter, Kn <sup>r</sup>                                                                                                                                                   | Lab stock                  |
| pGEX-6P-1      | Tac promoter, Ap <sup>r</sup>                                                                                                                                                        | Lab stock                  |
| pNN387         | Low copy vector, Cm <sup>r</sup>                                                                                                                                                     | Gift from Kunihiko Nishino |
| pTL39          | <i>ompR</i> +1 to +720 in pET28a <i>BamH I/Hind III</i> , Kn <sup>r</sup>                                                                                                            | This study                 |
| pTL40          | pTL39 with G63S, Kn <sup>r</sup>                                                                                                                                                     | This study                 |
| pTL63          | pTL39 with D55A, Kn <sup>r</sup>                                                                                                                                                     | This study                 |
| pTL65          | <i>envZ</i> +540 to +1353 in pGEX-6P-1 <i>BamH I/Xho I</i> , Ap <sup>r</sup>                                                                                                         | This study                 |
| pTL74          | <i>ompR</i> -250 to + 840 in pNN387 <i>Hind III/Not I</i> , Cm <sup>r</sup>                                                                                                          | This study                 |
| pTL75          | pTL74 with G63S, Cm <sup>r</sup>                                                                                                                                                     | This study                 |

**Reference**

1. Baba T, Ara T, Hasegawa M, Takai Y, Okumura Y, Baba M, Datsenko KA, Tomita M, Wanner BL, Mori H. 2006. Construction of Escherichia coli K-12 in-frame, single-gene knockout mutants: the Keio collection. *Mol Syst Biol* 2:2006 0008.

**TABLE S2.** Primers used in this study.

| Primer name | Sequence 5'→3'       |
|-------------|----------------------|
| gapA-F      | GCTCGTAAACACATCACCGC |
| gapA-R      | CGATGTCCTGGCCAGCATAT |
| ompC-F      | GACCTACATGCGTCTTGGCT |
| ompC-R      | GCTGTTGCCCTGGATCTGAT |
| ompF-F      | GACCGTACCAACCTGCAAGA |
| ompF-R      | GTTGCTGCCAGGTAGATGT  |
| ompR-F      | GCCTGCTGACTCGTGAATCT |
| ompR-R      | CGGGTTGCTCTGACTACGAA |
| dtpA-F      | CGTTGTAGGCCTGCTGATCA |
| dtpA-R      | GTCAGCAGCAGGTTACGGTA |
| csgD-F      | CAATGGGTTGCAAGGCGTC  |
| csgD-R      | GGGCTGATTCCGTGCTGTTA |

**TABLE S3.** Meropenem MIC of porin mutants carrying pNDM-HK.

| Strain                                        | Genotype      | MIC ( $\mu\text{g/mL}$ )<br>Meropenem |
|-----------------------------------------------|---------------|---------------------------------------|
| BW25113                                       | Wild-type     | 0.032                                 |
| JW3368                                        | $\Delta ompR$ | 0.032                                 |
| JW2203                                        | $\Delta ompC$ | 0.023                                 |
| JW0912                                        | $\Delta ompF$ | 0.047                                 |
| BW25113/pNDM-HK                               | Wild-type     | 6                                     |
| JW3368/pNDM-HK                                | $\Delta ompR$ | 32                                    |
| JW2203/pNDM-HK                                | $\Delta ompC$ | 4                                     |
| JW0912/pNDM-HK                                | $\Delta ompF$ | 6                                     |
| JW3368/pNDM-HK complemented<br>with WT OmpR   | /             | 12                                    |
| JW3368/pNDM-HK complemented<br>with G63S OmpR | /             | 24                                    |

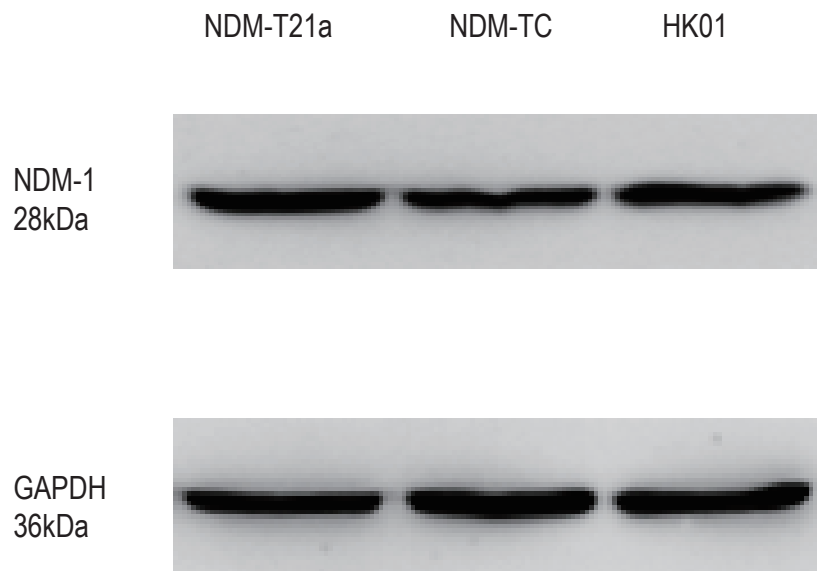

**FIG S1.** NDM-1 and GAPDH protein level in donor strain HK01, transconjugants NDM-T21a and NDM-TC by Western blot. GAPDH was probed as the loading control.

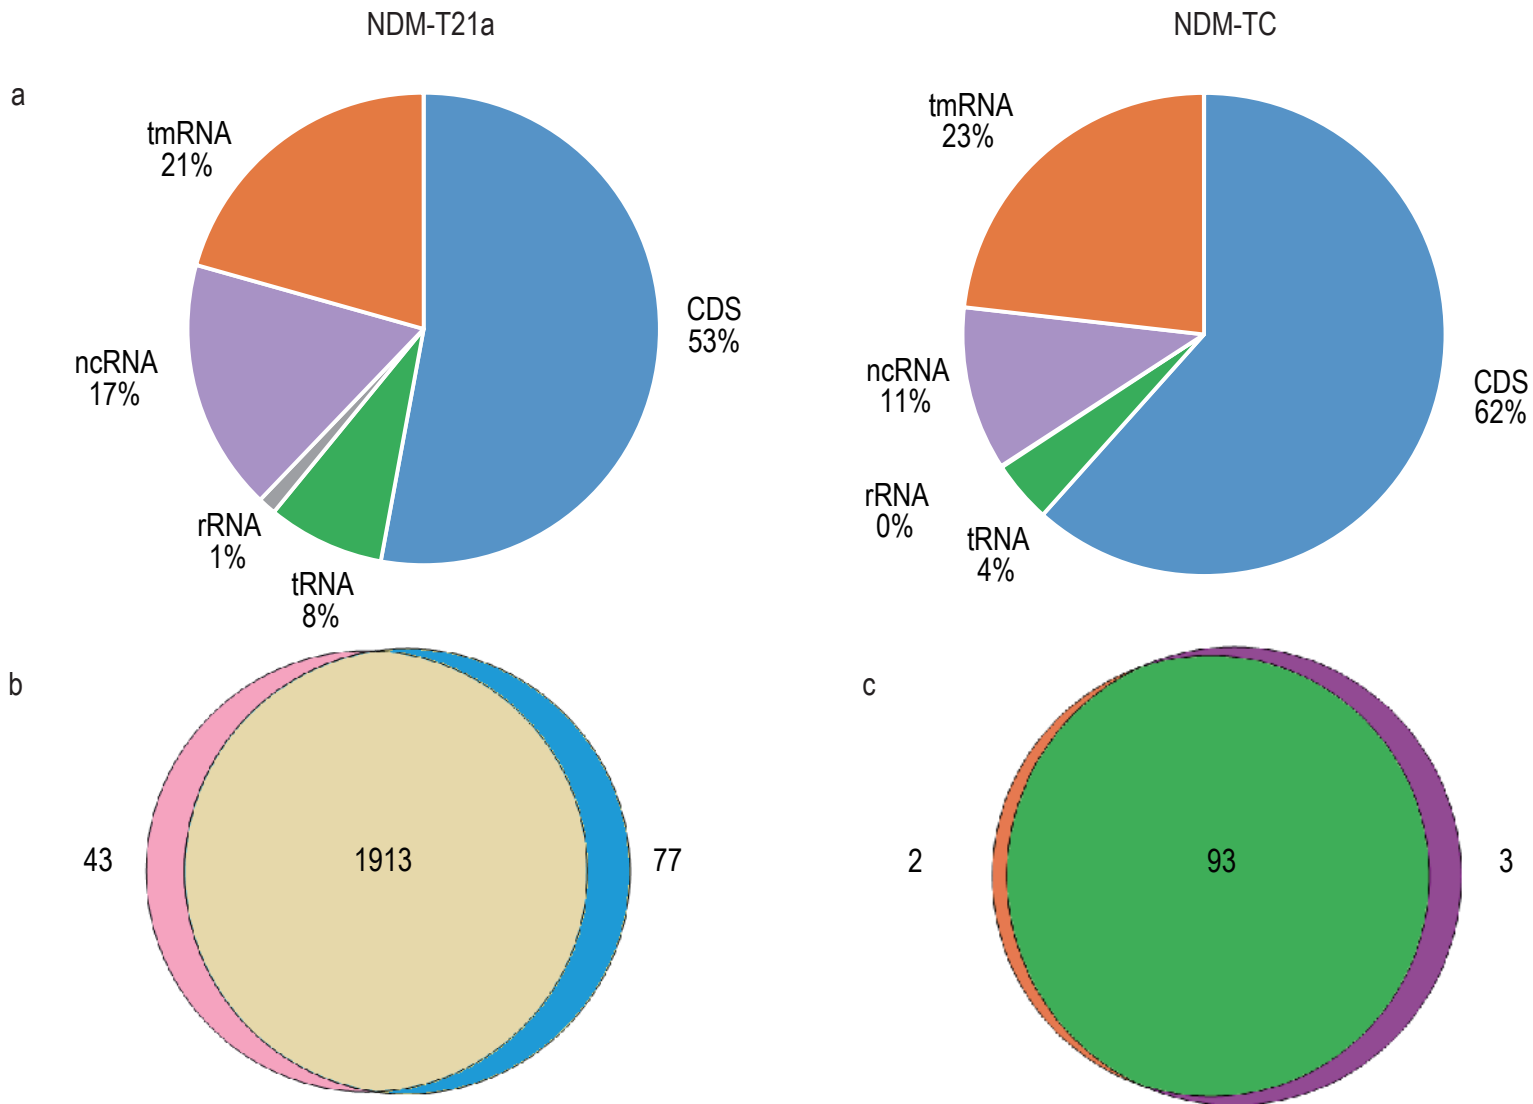

**FIG S2.** Sequencing statistics of NDM-T21a and NDM-TC. (a) Reads mapping to coding region (blue), rRNA (grey), tRNA (green), tmRNA (orange) and non-coding RNA (purple). (b) Number of chromosome-encoded genes of NDM-TC that are upregulated (blue), downregulated (pink) and unchanged (grey) compared with NDM-T21a. (c) Number of plasmid-encoded genes of NDM-TC that are upregulated (purple), downregulated (orange) and unchanged (green) compared with NDM-T21a.

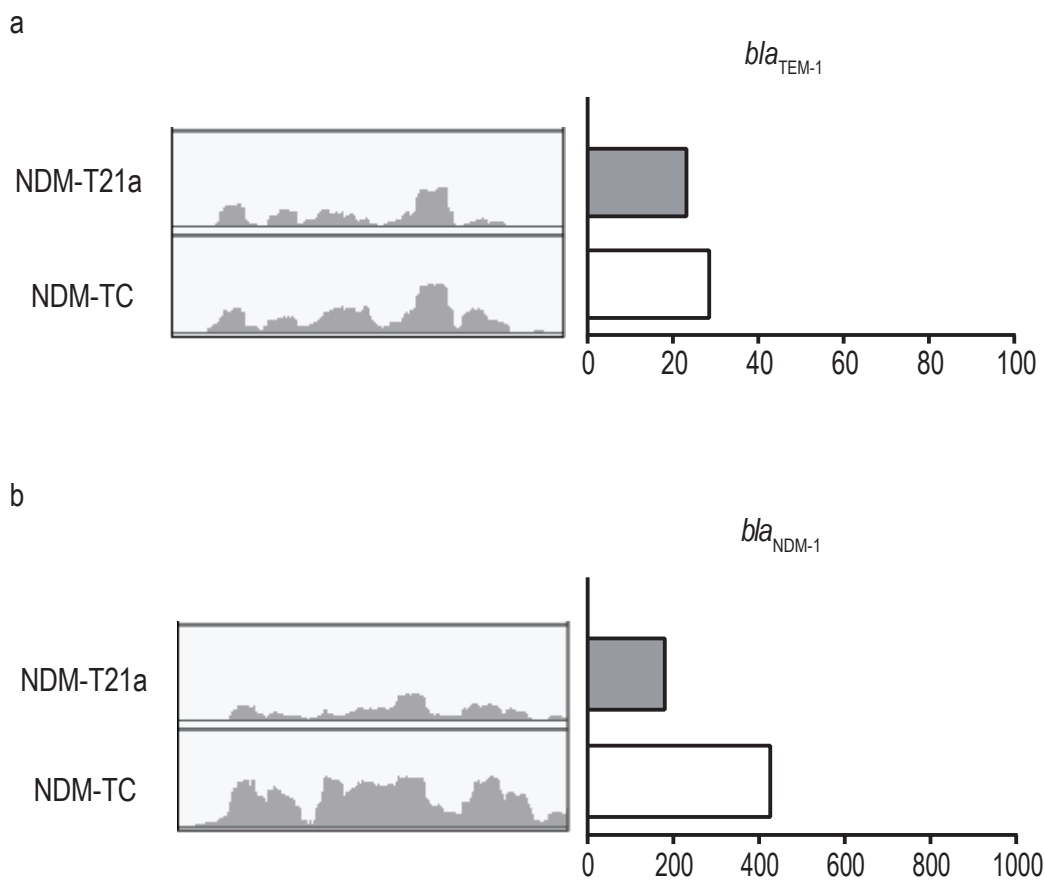

**FIG S3.** Read-count of  $bla_{TEM-1}$  and  $bla_{NDM-1}$ . Number of read count of genes (a)  $bla_{TEM-1}$  and (b)  $bla_{NDM-1}$  obtained in RNA-Seq of NDM-T21a (grey column) and NDM-TC (white column) is posted. IGV-captured diagrams with the same scale are placed next to the bar chart.

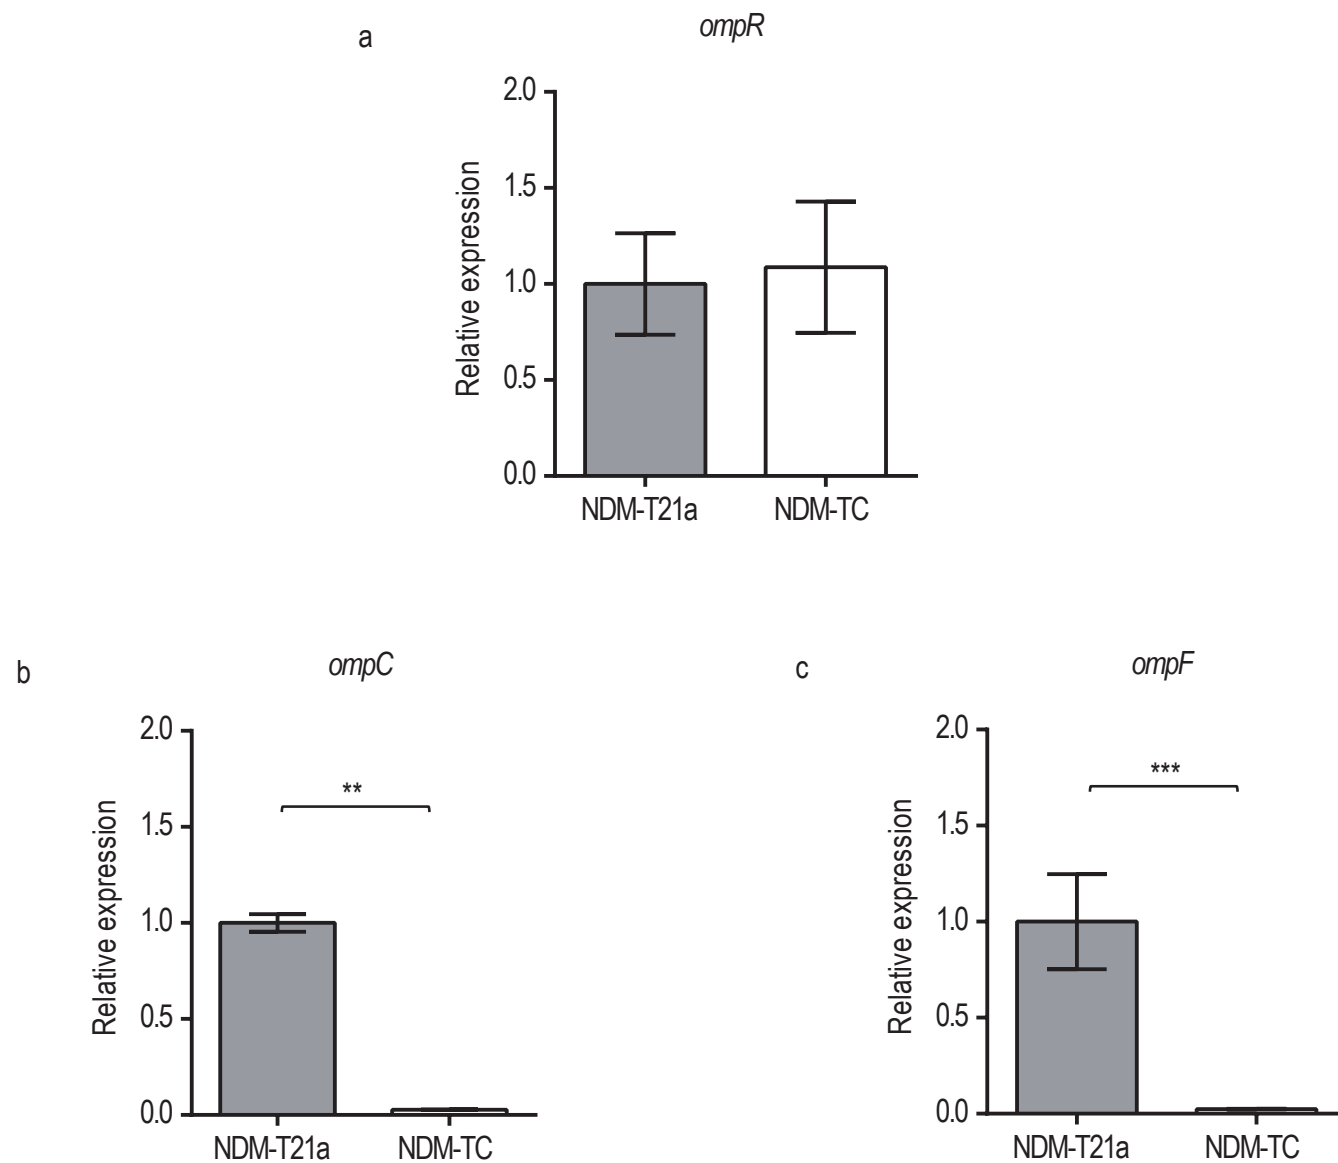

**FIG S4.** Transcription level of porin genes obtained by qRT-PCR. Expression levels of (a) *ompR*, (b) *ompC*, and (c) *ompF* in transconjugants NDM-T21a (grey column) and NDM-TC (white column) obtained by qRT-PCR. Vertical error bars show the standard deviations of biological triplicates. The expression level obtained in NDM-T21a is set as reference for comparison. \*P-value<0.05; \*\*P-value<0.01; \*\*\*P-value<0.001.



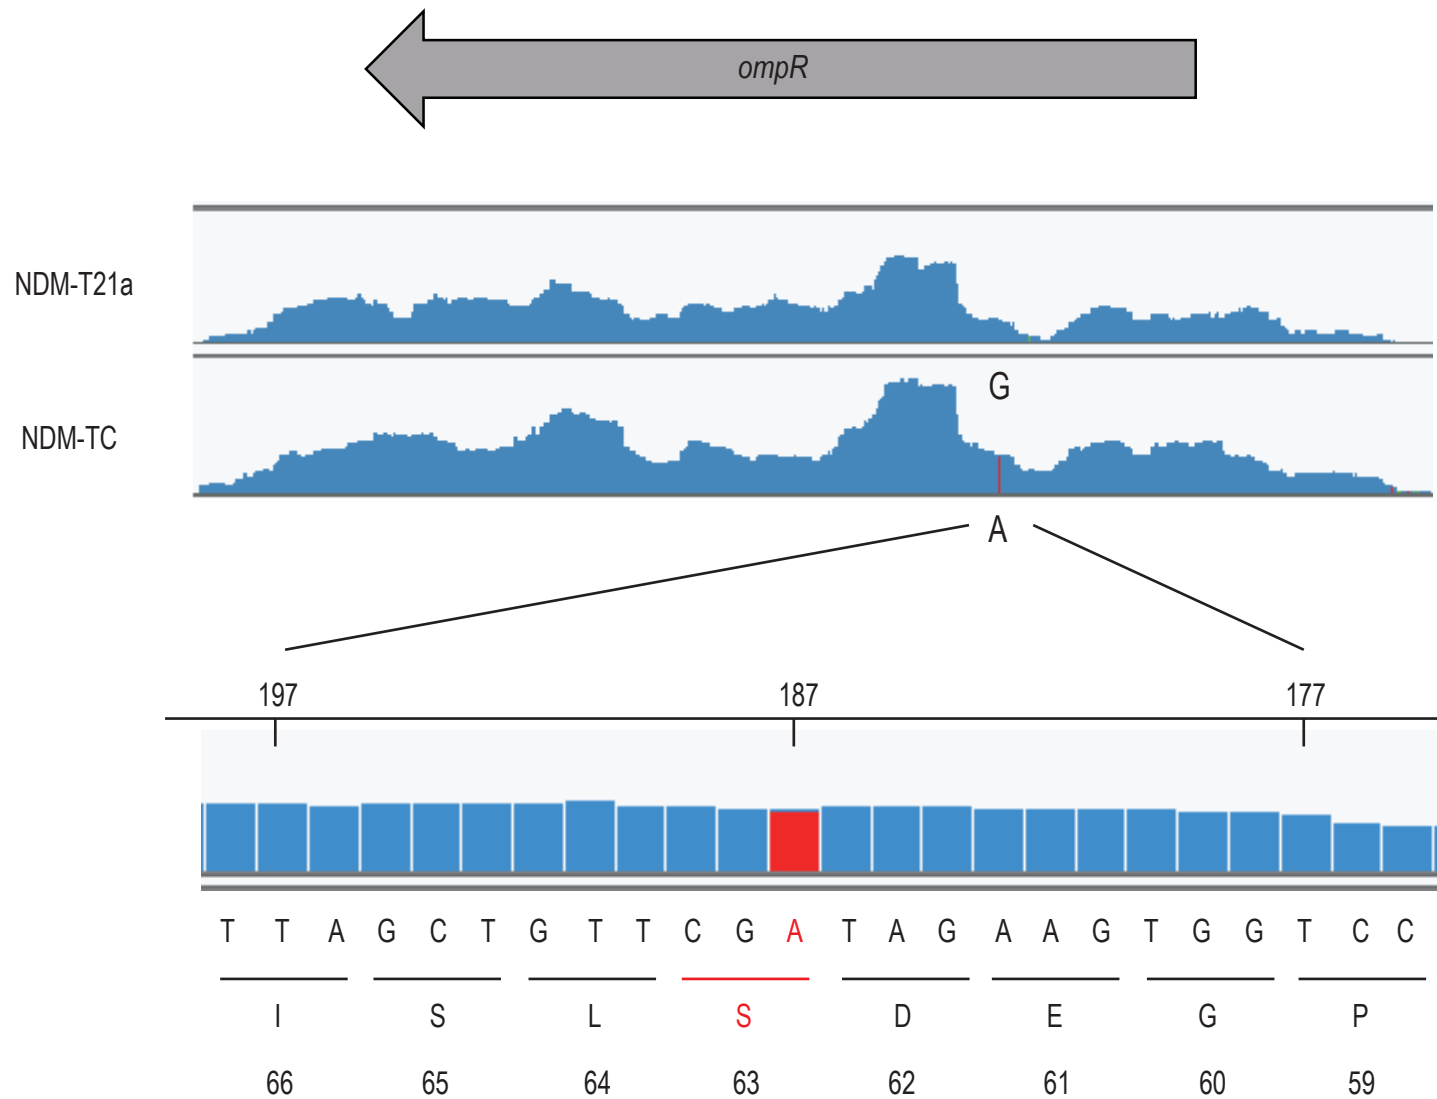

**FIG S5.** IGV diagram of *ompR* gene in transconjugants NDM-T21a and NDM-TC. Region flanking nucleotides 177-197 of *ompR* in NDM-TC are zoomed in and the corresponding amino acids are placed below the DNA sequences.

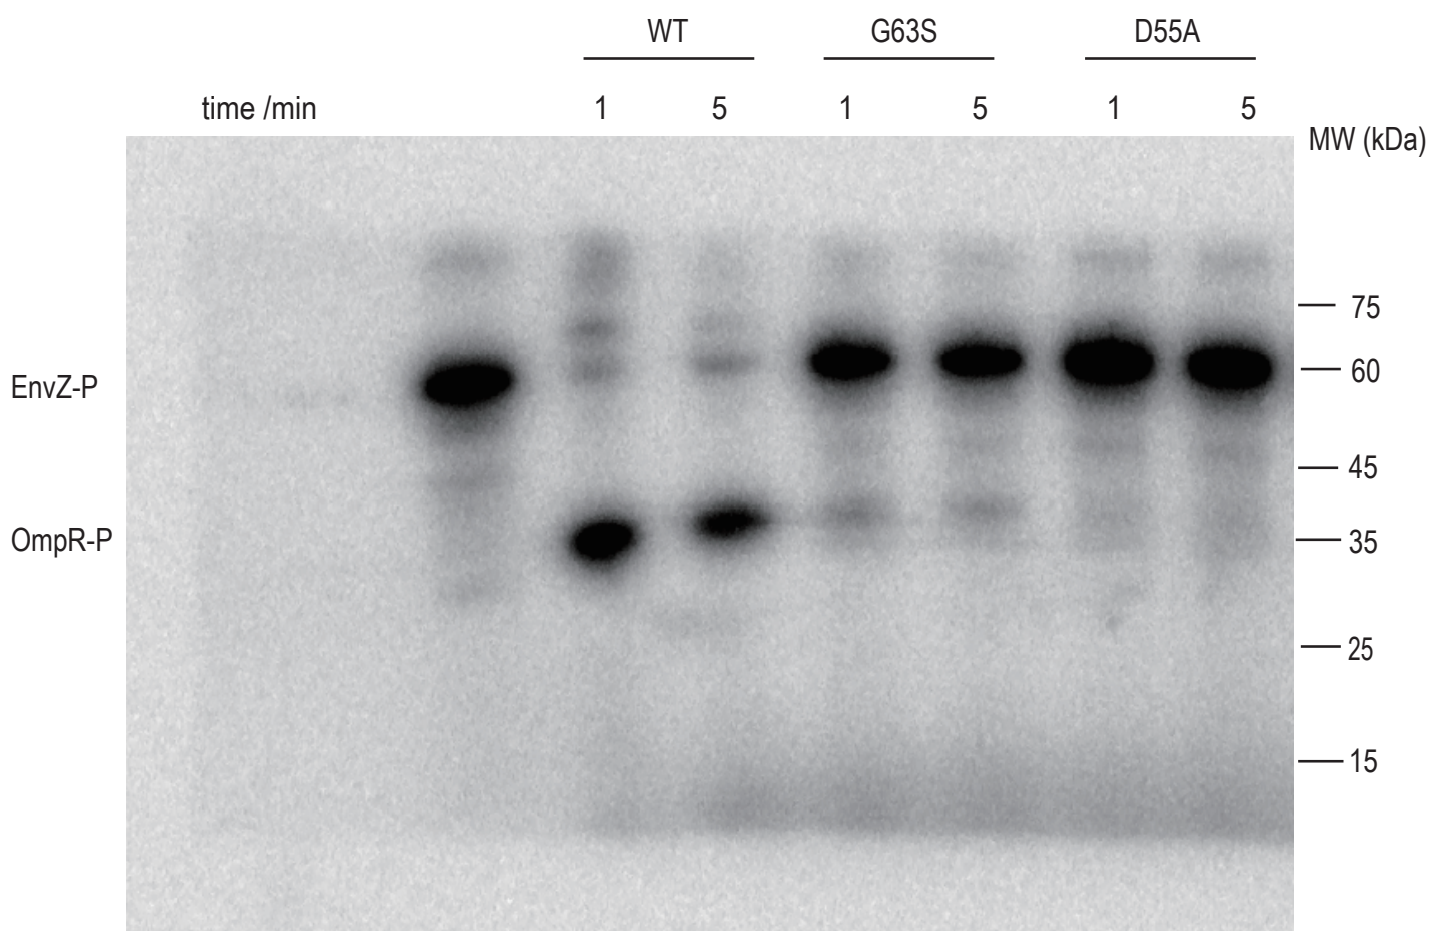

**FIG S6.** Full image of electrophoretic gel Fig 3.

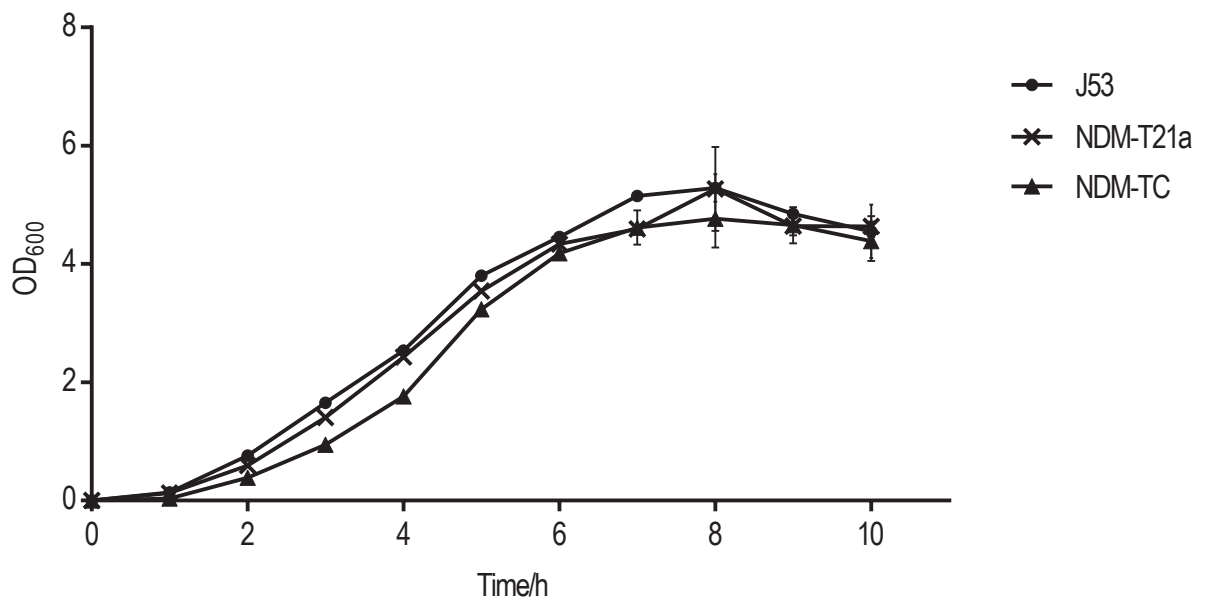

**FIG S7.** Growth curve of *E. coli* J53, NDM-T21a and NDM-TC. Vertical error bars represented standard deviation of biological triplicate.
